# Supplementary material
Source: PubMed Central journal article supplement (PMC4918420)
Supplement: PRO-25-1332-s001.pdf [file PRO-25-1332-s001.pdf]

**Supporting Information for: Evolutionary dynamics of viral escape under  
antibody stress: A biophysical model**

<sup>1</sup>Nicolas Chéron<sup>#</sup>, <sup>1,2</sup>Adrian W.R. Serohijos<sup>#</sup>, <sup>1</sup>Jeong-Mo Choi, and <sup>1</sup>Eugene I. Shakhnovich\*

<sup>1</sup>Department of Chemistry and Chemical Biology, Harvard University, Cambridge MA 02138, USA; <sup>2</sup>Département de Biochimie et Centre Robert-Cedergren en Bioinformatique et Génomique, Université de Montréal, Montréal, Quebec H3T 1J4, Canada

\*Correspondence: [shakhnovich@chemistry.harvard.edu](mailto:shakhnovich@chemistry.harvard.edu)

Tel: (617) 495-4130. Fax: (617) 384-9228.

<sup>#</sup>These authors contributed equally to this work.

**1. Experimentally observed mutation rates and burst size of some RNA viruses**

| <b>Group</b>    | <b>Virus</b>               | <b>Genome size (kb)</b> | $\mu_n$              | $\mu_g$ | <b>M</b> |
|-----------------|----------------------------|-------------------------|----------------------|---------|----------|
| <b>ssRNA(+)</b> | Tobacco mosaic virus       | 6.40                    | $8.7 \times 10^{-6}$ | 0.056   | n.a.     |
|                 | Human rhinovirus 14        | 7.13                    | $6.9 \times 10^{-5}$ | 0.49    | n.a.     |
|                 | Poliovirus 1               | 7.44                    | $9.0 \times 10^{-5}$ | 0.67    | 1694     |
|                 | Tobacco etch virus         | 9.49                    | $1.2 \times 10^{-5}$ | 0.11    | 1555     |
|                 | Hepatitis C virus          | 9.65                    | $1.2 \times 10^{-4}$ | 1.2     | n.a.     |
|                 | Murine hepatitis virus     | 31.4                    | $3.5 \times 10^{-6}$ | 0.11    | 650      |
| <b>ssRNA(-)</b> | Vesicular stomatitis virus | 11.2                    | $3.5 \times 10^{-5}$ | 0.39    | 1250     |
|                 | Influenza A virus          | 13.6                    | $2.3 \times 10^{-5}$ | 0.31    | 50       |
|                 | Influenza B virus          | 14.5                    | $1.7 \times 10^{-6}$ | 0.024   | n.a.     |

**Table S1.** Experimentally observed mutation rates and burst size (M) of some RNA viruses (from ref. (22)).  $\mu_n$  is the mutation rate per nucleotide,  $\mu_g$  is the mutation rate per genome ( $\mu_g = \mu_n * \text{genome size}$ ). n.a.=not available.

## 2. Influence of biophysical parameters on the fitness function.

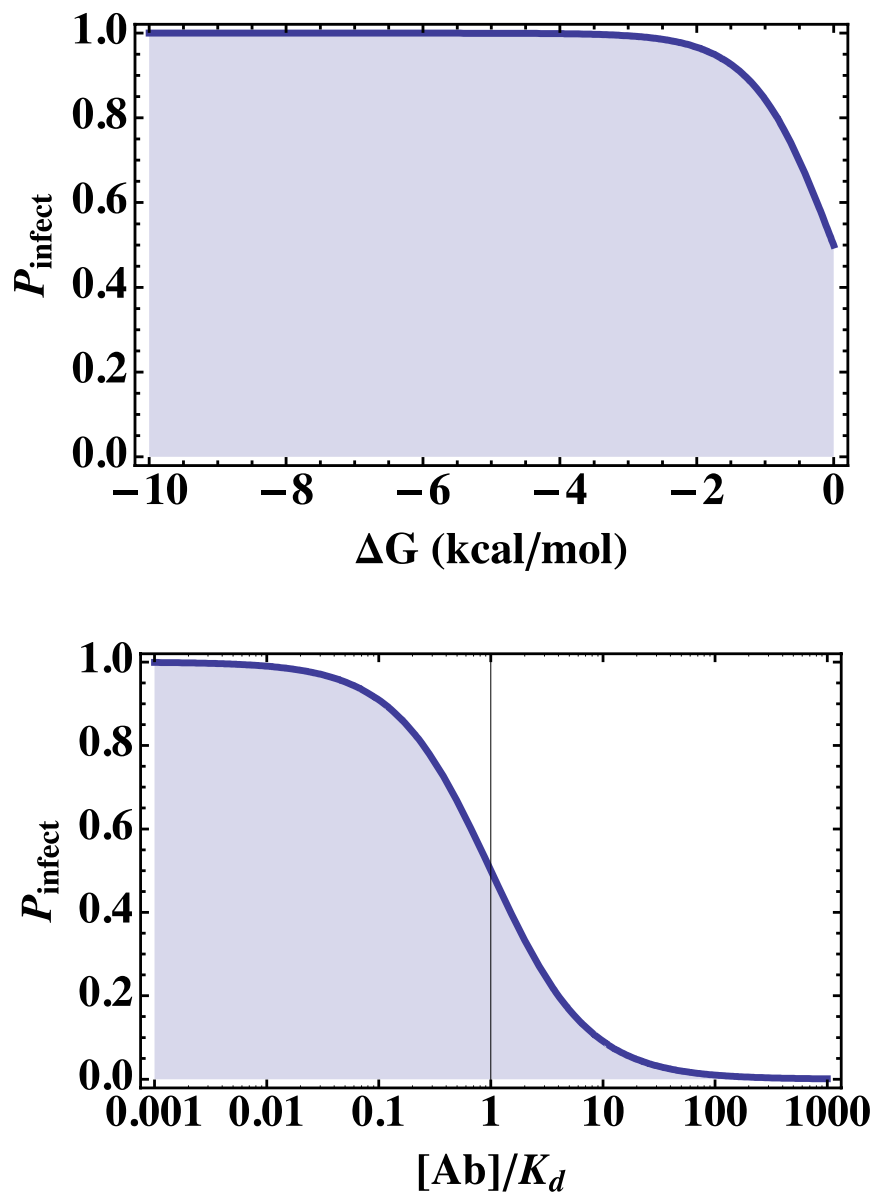

Figure S1. Influence of biophysical parameters  $\Delta G$  and  $K_d$  on  $P_{\text{inf.}}$ .

### 3. Trajectory of evolution

Shown in Figure S2 is a typical evolutionary trajectory using the biophysics-based population dynamics model. This specific trajectory used a single protein of 208 amino acids, a mutation rate per nucleotide of  $\mu_n=10^{-2}$  ( $\mu_{genome}=7.56$ ) and a burst size of  $M=100$ . Starting with  $10^5$  viral particles and no external pressure (that is,  $[Ab]=0$ ), the viral count first increases and quickly equilibrates to the viral count dictated by mutation-selection balance. Antibody is then “added” at passage 101, the viral count collapses but eventually increases after finding a beneficial mutation that allows escape from the antibody. The population count at the new steady state with antibody pressure is lower than that without antibody.

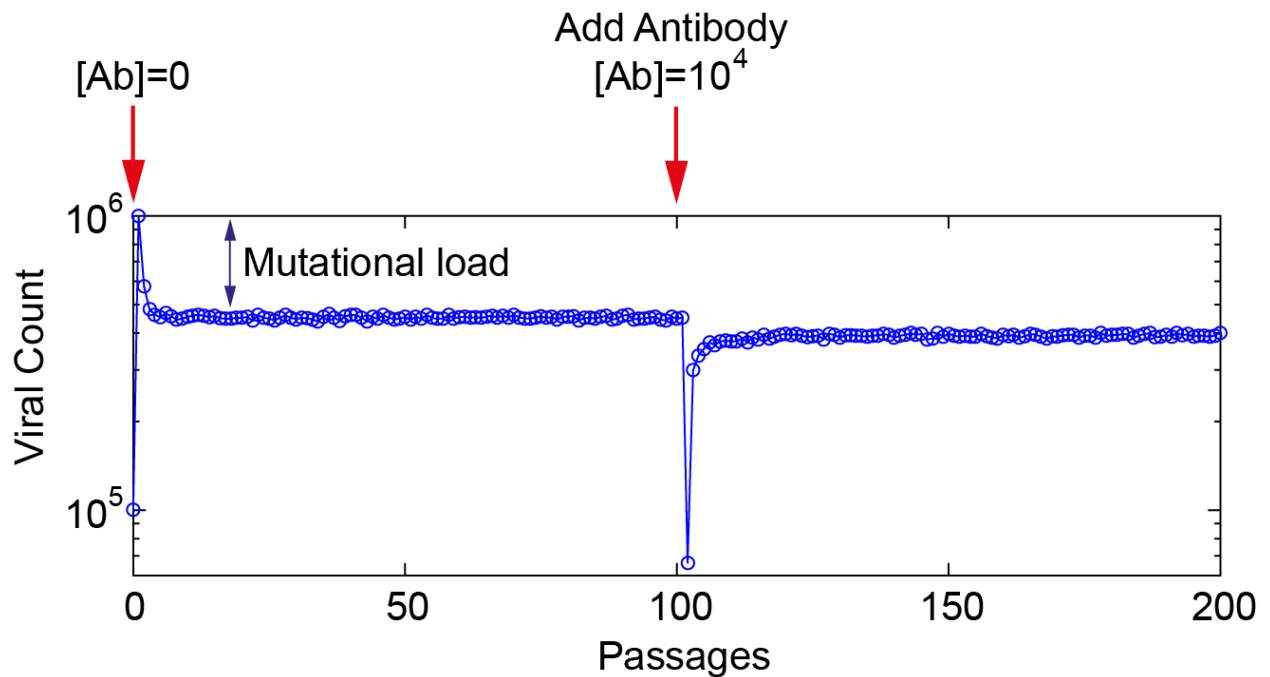

**Figure S2.** Viral population dynamics.

#### 4. Influence of the genome size

The optimal mutation rate does not strongly depend on per genome mutation rate (Figure S3-a). However, when the phase diagrams are plotted with respect to the mutation rate per genome (Figure S3-b), a trend appears: the longer the genome, the lower the optimal mutation rate per nucleotide.

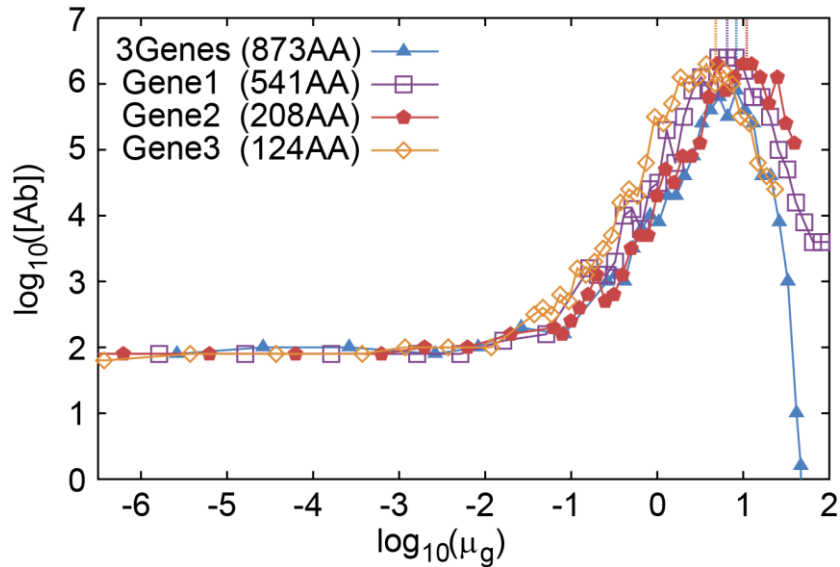

(a) Influence of the genome size with respect to the mutation rate per genome

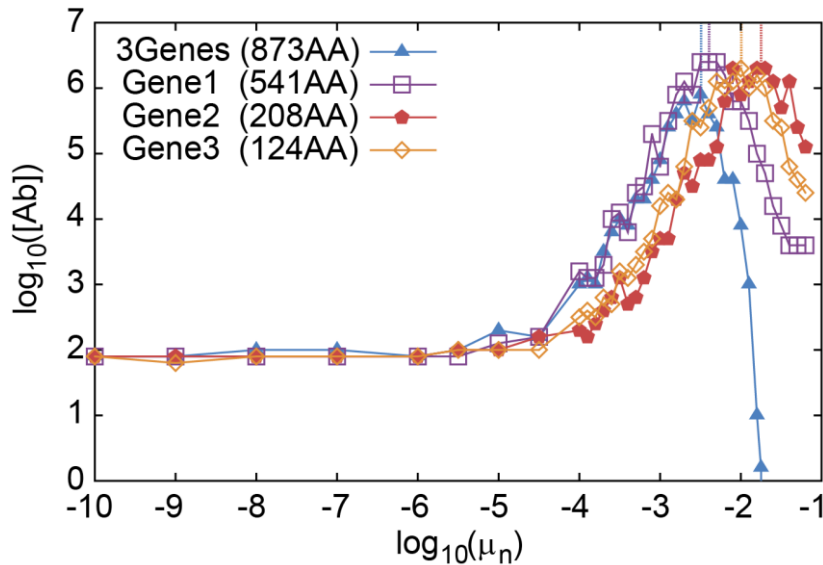

(b) Influence of the genome size with respect to the mutation rate per nucleotide

**Figure S3.** Influence of the genome size (the optimal mutations rates are marked with vertical lines at the top of each curve).

### 5. Influence of the burst size

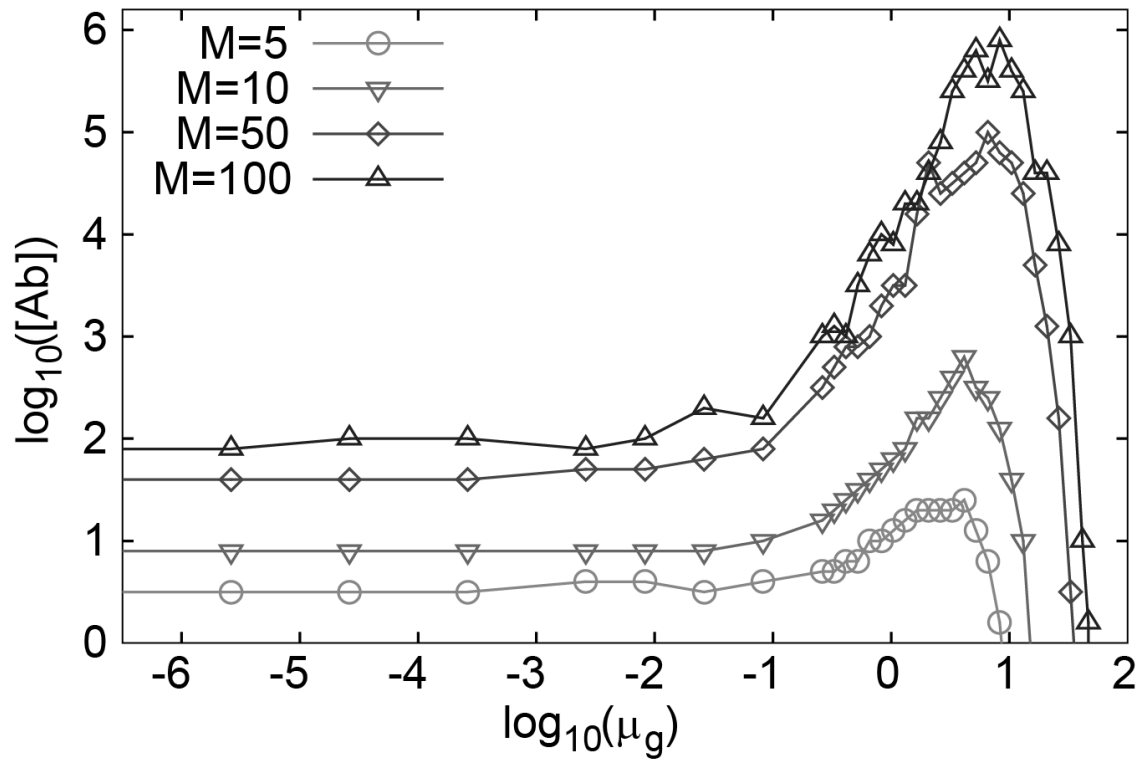

**Figure S4.** Influence of the burst size ( $M$ ) on the phase diagram.
